# Supplementary material
Source: PubMed Central journal article supplement (PMC4223184)
Supplement: mmc1.pdf [file mmc1.pdf]

A SEW MPTPDATTPQ<sup>10</sup> AKGFRRAVSE<sup>20</sup> LDAQAEAIM<sup>30</sup> SPRFIGRRQS<sup>40</sup> LIEDARKERE<sup>50</sup>

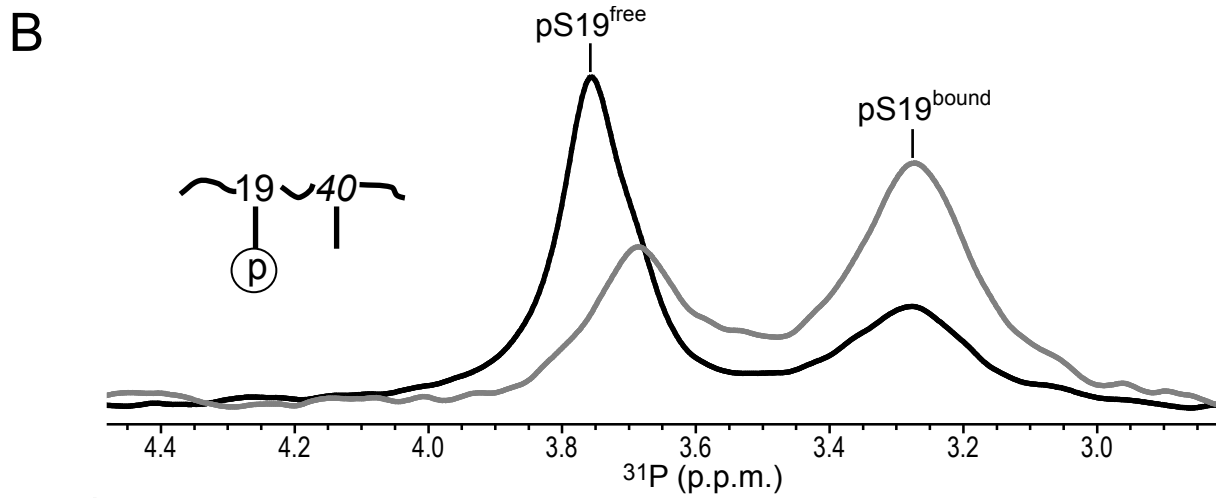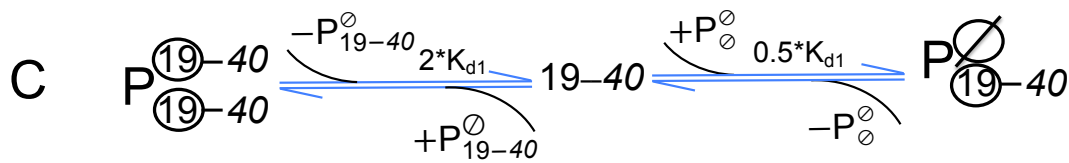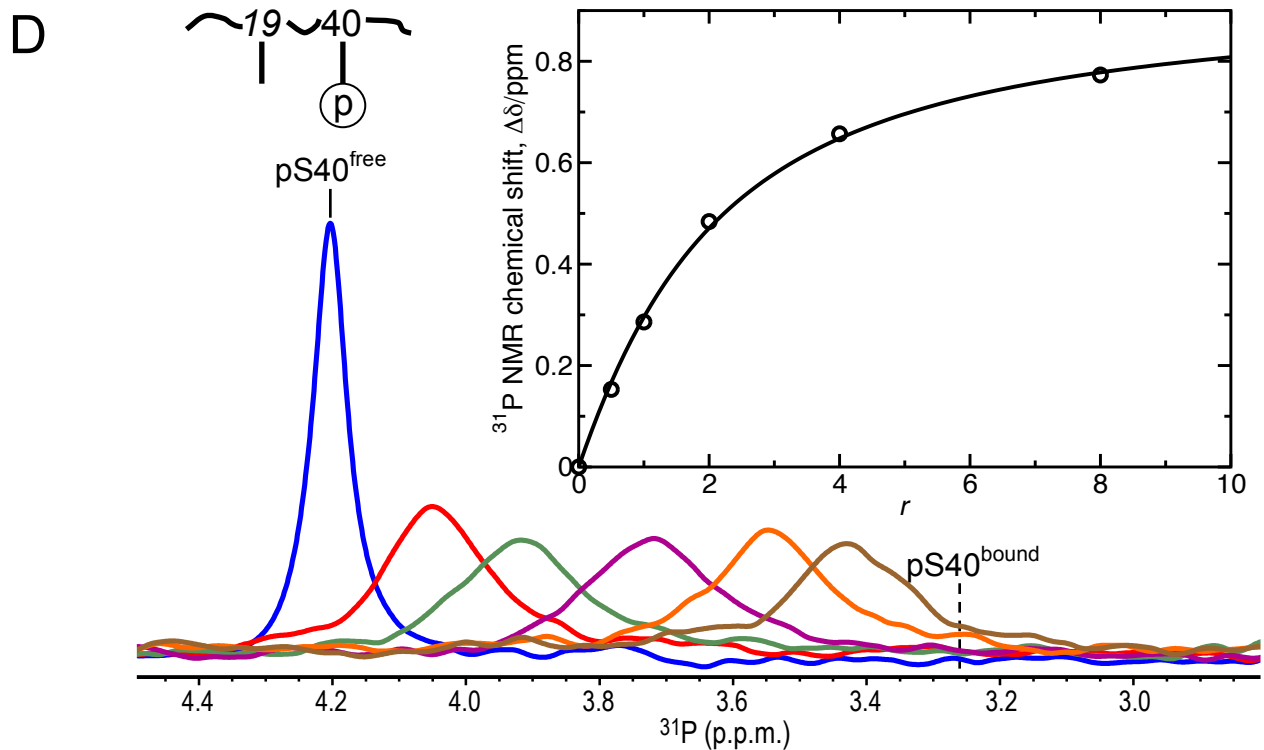

Figure 1
